# Supplementary material for: Invited perspective: Redefining Disaster Risk: The Convergence of Natural Hazards and Health Crises
Source: Copernicus journal article supplement (doi:10.5194/egusphere-2025-920), 2025-03-06
Supplement: Supplementary file [file egusphere-2025-920-RC3-supplement.pdf]

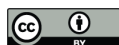

# Invited perspective: Redefining Disaster Risk: The Convergence of Natural Hazards and Health Crises

Nivedita Sairam<sup>1</sup> and Marleen C. de Ruiter<sup>2</sup>

<sup>1</sup> Section Hydrology, GFZ German Research Centre for Geosciences, Potsdam, Germany

5 <sup>2</sup> Institute for Environmental Studies, Vrije Universiteit Amsterdam, De Boelelaan 1111, 1081HV, Amsterdam, the Netherlands

*Correspondence to:* Marleen de Ruiter (m.c.de.ruiter@vu.nl)

**Abstract.** Recently, the disaster risk field has made substantial steps forward to develop increasingly comprehensive risk assessments, accounting for the incidence of multiple hazards, trickle-down effects of cascading disasters and/or impacts, and spatiotemporal dynamics. While the COVID-19 outbreak increased general awareness of the challenges that arise when disasters from natural hazards and diseases collide, we still lack a comprehensive understanding of the role of disease outbreaks in disaster risk assessments and management, and that of health impacts of disasters. In specific, the occurrence probabilities and the impacts of disease outbreaks following natural hazards are not well-understood and are commonly excluded from multi-hazard risk assessments and management.

10 Therefore, in this perspective paper, we call for 1. learning lessons from compound risks and the socio-hydrology community for modelling the occurrence probabilities and temporal element (lag times) of disasters and health/disease-outbreaks, 2. the inclusion of health-related risk metrics within conventional risk assessment frameworks, 3. improving data availability and modelling approaches to quantify the role of stressors and interventions on health impacts of disasters. Based on this, we develop a research agenda towards an improved understanding of the disaster risk considering potential health

15 crises. This is not only crucial for scientists aiming to improve risk modelling capabilities, but also for decision makers and practitioners to anticipate and respond to the increasing complexity of disaster risk.

20

## 1 Introduction

On August 14, 2021, a 7.2 Mw earthquake struck Haiti's southern peninsula, followed by smaller aftershocks, including a 5.8 Mw earthquake. The earthquake caused widespread landslides and rockfalls, damaging roads and isolating communities

25 (Cabas et al., 2023). It resulted in over 12,000 injuries, 300+ missing, and at least 2,248 deaths, with 137,000 homes destroyed or severely damaged. Key infrastructure, including schools, churches, bridges, and roads, was also impacted, disrupting access to education, water, sanitation, and healthcare services (CDEMA, 2021; GoH, 2021). As many remained outdoors due to damaged homes and aftershock fears, tropical storm Grace struck on August 16-17, causing heavy rainfall, winds, flash flooding, and landslides, which halted rescue efforts for hours (Cavallo et al., 2021; Reinhart & Berg, 2022).

30 The storm's impact, compounded by the earthquake, made it difficult to distinguish the sources of casualties (Reinhart & Berg, 2022). Initial aid was delayed due to the remote and inaccessible regions affected (Cabas et al., 2023; Daniels, 2021).



The destruction of WASH and healthcare facilities increased the risk of waterborne diseases, contributing to a cholera outbreak a year later. By November 2022, over 230 people had died from cholera, with 12,500 suspected cases (IFRC, 2022). Additionally, many people, forced to sleep outside or in inadequate shelters, were vulnerable to storm-related hazards and aftershocks (Daniels, 2021; OCHA, 2021).

In contrast to these acute disasters in Mozambique, during 2017-2018, Kenya and Ethiopia were exposed to slow onset, chronic disasters caused by back-to-back hydrological extremes. A severe drought (Funk et al., 2019; Philip et al., 2018; Uhe et al., 2018) lasting 18-24 months was immediately followed by widespread floods (Kilavi et al., 2018; Njogu, 2021). During this time both countries also grappled with an infestation of armyworm (De Groote et al., 2020; Kumela et al., 2019) which was responsible for a reduction of food crop production. In addition to the climatic shocks and biological hazards, Kenya faced prolonged government elections that led to increased government expenses, violence and unrest. In Ethiopia, the situation was exacerbated by civil unrest and ethnic violence. These compounding factors heightened the vulnerability of communities in both countries culminating in a humanitarian crisis, with four million people under food insecurity in Kenya (FEWS NET, 2018) and eight million people in Ethiopia (FEWS NET, 2019).

Changing climate is expected to exacerbate 58% of human infectious diseases, with vector and waterborne diseases being the most affected (Mora et al., 2022). In addition to the climatic conditions, research suggests that the probability of a disease outbreak following a hazard is influenced by underlying dynamics of socioeconomic vulnerability (Jutla et al., 2013, McMichael 2009, Aitsi-Selmi and Murray 2016, Mazdiyasni and AghaKouchak 2020). Socially vulnerable populations are being disproportionately affected by the mortality associated with climate change impacts (Agache et al. 2022).

The COVID-19 outbreak increased general awareness of the challenges that arise when disasters from natural hazards and diseases collide (Tripathy et al. 2021). However, we still lack a proper understanding of the role of health, well-being, and disease outbreaks in disaster risk assessments and management. Considering the reality of rapidly changing risk dynamics (Kreibich et al. 2022), a systemic understanding of the Disaster–Disease Outbreak dynamics – i.e., the pathways through which cascading effects of extreme weather events trigger disease outbreaks and impact human health, is currently lacking. This is necessary to prevent the outbreak of diseases in the aftermath of natural hazards; develop socially-optimal and sustainable climate adaptation strategies, early warning systems, as well as relief and recovery. The examples of Mozambique, Kenya and Ethiopia demonstrate some of the health impacts of disasters and effects of consecutive disaster-disease outbreaks. These impacts will not be captured when taking a hazard-silo approach to disaster risk.

The United Nations Office for Disaster Risk Reduction (UNDRR, 2022) underscored the urgency to understand (1) changing socioeconomic vulnerability due to an earlier disaster, (2) probabilities of hazard interactions, (3) how the time-window of consecutive disasters affects impacts, and (4) the linkages between disasters, health impacts, and disease outbreaks. In

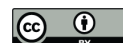

response, in past years, we have seen a rise in multi-(hazard) risk studies trying to understand some of these complexities conceptually (e.g., Ward et al., 2022, Murray 2020, UNDRR 2022) and statistically (e.g., Zscheischler et al., 2018, Bevacqua et al., 2022, De Luca et al. 2017). Moreover, De Ruiter and Van Loon (2022) discuss the great potential that exists to capture dynamics of vulnerability using existing methods used in neighbouring research fields such as compound events and socio-hydrology to capture other risk dynamics. Recently, the disaster risk field has made substantial steps forward to develop increasingly comprehensive risk assessments, accounting for the incidence of multiple hazards, trickle-down effects of cascading disasters and/or impacts, and spatiotemporal dynamics (e.g., Sett et al. 2024, Jato-Espino et al., 2025, Xoplaki et al., 2025).

The importance of accounting for the temporal dynamics of socioeconomic vulnerability has been underscored in recent literature (e.g., De Angeli et al., 2022, Mora et al., 2022, Matanó et al., 2022, Kelman, 2020, Drakes and Tate 2022). Nonetheless, while in recent years many studies have focused on compound hazards (Ridder et al., 2020, Cutter 2018, Leonard et al., 2014, Zscheischler et al., 2020), the dynamics of vulnerability remain the least understood component of risk (Simpson et al., 2021, Drakes and Tate 2022, Hagenlocher et al., 2019). Owing to the complexity of health impacts, they result in heterogeneous outcomes at individual levels, requiring adaptation measures to be precisely based on time, place and context. Hence, understanding and modelling vulnerability dynamics is a critical component to develop a systemic understanding of the Disaster–Disease Outbreak dynamics and their consequences on human health. The importance of accounting for health-related outcomes is acknowledged by the Sendai Framework for Disaster Risk Reduction (SFDRR; 2018) but it typically remains unaccounted for in risk assessments (Mazdiyasni and AghaKouchak 2020, Tilloy et al., 2019).

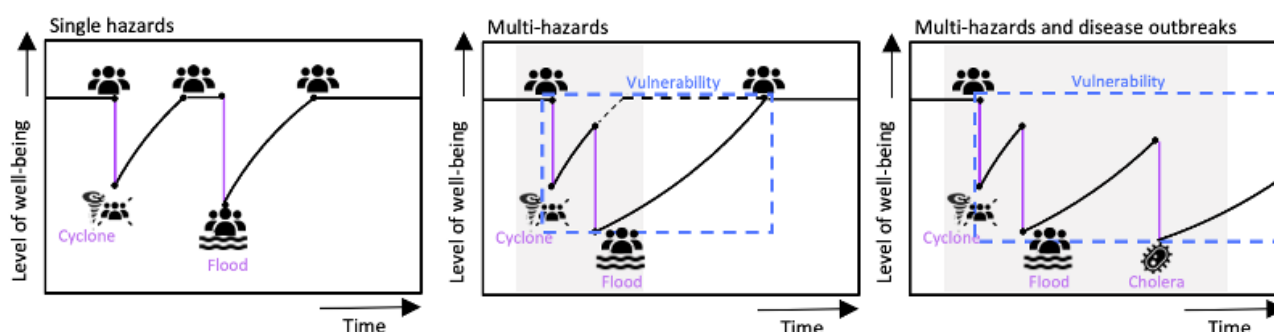

**Figure 1: Increasing disaster-risk complexity.** The figure shows from left to right increasing complexity from a typical single hazard perspective of impacts of hazards on the level of well-being, to a multi-hazard perspective, to the inclusion of disease outbreaks.

In this perspective paper, we call for a research agenda that 1. collaborates with compound risks and socio-hydrology community to advance the modelling of occurrence probabilities and temporal element (lag times) of disasters and health/disease-outbreaks, 2. develops quantitative health risk metrics to be integrated within conventional risk management



frameworks; 3. Identifies potential data sources and develops approaches to identify and map the role of stressors, interventions and their effects on the health of the affected populations. This is imperative to not only advance our systemic understanding of the Disaster–Disease Outbreak dynamics but also, enhance our modelling capabilities of the complexities of disaster risk and support the much-needed integration of public-health emergencies into risk assessments, as called for in recent scientific literature (Hillier et al., 2020, AghaKouchak et al., 2020, Simpson et al., 2021) and in recent international agreements and reports (UN 2015, WHO 2019).

## 2 State of the art and challenges

### 2.1 Co-occurrence of disasters and diseases

To understand the complex temporal dynamics between disasters and disease outbreaks, and to account for local socioeconomic circumstances that contribute to a community's vulnerability (Fig.1), we require methods to assess their dependency and interactions over time. In recent years, compound hazard research has advanced multivariate-statistical methods, including Bayesian Networks (BNs) (e.g., Sperotto et al., 2017), to quantify hazard dependencies and joint probabilities of co-occurring disasters (Raymond et al., 2020; Tilloy et al., 2019; Hagenlocher et al., 2019; Drakes and Tate 2022; Ridder et al., 2020). These studies focus on a single hazard and co-occurring (climate-) drivers (e.g., Couasnon et al., 2020; Paprotny et al., 2020; Wahl et al., 2015; Mazdiyasni and AghaKouchak 2020; Moftakhari et al., 2019) or joint hazards such as droughts, heatwaves, and fires (e.g., Raymond et al., 2020; Matthews et al., 2019; Sutanto et al., 2020; Zscheischler and Sereviratne 2017). These methods have also been recommended to predict disease outbreaks after a natural hazard (e.g., Tilloy et al., 2019; Hashizume et al., 2008). Despite their limited application in multi-risk, recent studies demonstrated the promising use of BNs to 1) capture the complexities and dependencies of multi-risk due to their ability to include numerous variables with multiple dependencies, and 2) model the probability of impact chains caused by interactions between multiple variables (Sperotto et al., 2017; Tilloy et al., 2019; Liu et al., 2015; Marzocchi et al., 2012). A key limitation in using BNs for multi-hazard risk has been the challenge to incorporate temporal dynamics and feedback loops (Sperotto et al., 2017 and Tilloy et al., 2019). However, Khakzad (2015) demonstrated for a risk analysis of chemical plants that this can be overcome by developing a Dynamic BN (DBN). A DBN relates variables to each other over sequential time steps. This enables the modelling of time dependencies and complex interactions between variables while accounting for cascading effects (Khakzad, 2015).

Despite the methodological advances, one of the key challenges of using multivariate- statistical methods is the need for long-term, high-resolution, and spatiotemporally explicit data (Tilloy et al., 2019). Claassen et al. (2023) developed a global database of individual hazards and their consecutive occurrence. In recent years, global datasets on vector and waterborne diseases, water supply, sanitation and hygiene (WASH), and socioeconomic indicators have increasingly become available, such as the Surveillance Atlas of Waterborne and Infectious Diseases (European Center for Disease Prevention and Control



125 2023), Burden of Waterborne Disease Estimates (Centres for Disease Control and Prevention 2023), WHO's WASH-  
database (WHO/UNICEF Joint Monitoring Programme 2024) and UNDP's HDI-database (UNDP 2023). Combining  
innovative modelling methods from natural hazard risk research with these available datasets will potentially contribute to  
extracting meaningful insights into the co-occurrence of disasters and diseases.

## 130 2.2 Health impacts in risk management frameworks

State-of-the-art risk assessment frameworks for natural hazards integrate hazard, exposure, and vulnerability components to  
estimate risk, often expressed in economic terms such as Expected Annual Damage (EAD) and Value at Risk (VaR) (Sairam  
et al., 2019, Steinhausen et al. 2021, Ye et al. 2024). However, adaptation decisions based solely on these metrics often fail  
to account for non-economic dimensions, including environmental, social, and health impacts. In some cases, the number of  
135 exposed individuals—a simplistic measure of human exposure—is reported alongside economic losses (Alfieri et al., 2015;  
Scheiber et al. 2024).

The majority of the studies addressing negative health outcomes due to natural hazards either review past reports on impacts  
such as fatalities, injuries and spread of diseases (Stanke et al 2012, Kouadio et al. 2012, Suk et al. 2020, Charnley et al.  
140 2021) or conduct empirical analysis correlating disease trends to climate or hazard variables (Lo lacono et al. 2017, Wu et al.  
2016, Foudi et al. 2017). Very few longitudinal studies control for confounding factors (Walker-Springett et al. 2017,  
Bubeck et al. 2020) and quantify the effectiveness of post-disaster relief and response (Apel & Coenen, 2020). Indicators of  
prevalence of diseases such as risk ratio, odds ratio and incidence rate (Lee et al. 2020, Paranjothy et al. 2011) are commonly  
regressed against climate variables such as temperature, precipitation and socio-economic indicators such as income and  
145 gender (Speis et al. 2019, Paranjothy et al. 2011). Although significant correlation may be revealed among these attributes,  
they do not contribute to process/causal understanding of the pathways through which cascading effects of disease outbreaks  
triggered by hazards and the impact on human health.

Health care expenses and metrics such as Disability Adjusted Life Years (DALY), which combine Years of Life Lost (YLL)  
150 due to fatalities and Years Lived with Disability (YLD), are used to quantify the health burden as a consequence of disasters  
(Chatterton et al. 2010, Huynh et al, 2024). Yet, these metrics remain absent from risk assessment frameworks. Disaster  
impacts, both socio-economic and health related, often create cascading effects that worsen the overall consequences  
(Charnley et al. 2021), for example, the cascading effects of the immediate and short-term impacts such as injuries or  
financial losses on long-term physical health impacts such as musculoskeletal and cardiovascular diseases and psycho-social  
155 impacts such as depression and Post-Traumatic Stress Disorder (PTSD) (Berry et al. 2018). State-of-the-art impact metrics  
can rarely capture these complex cascading impacts. Since health impacts are commonly only reported at the regional or  
national scale (Lee et al. 2020), it is challenging to attribute these impacts to mentioned drivers that are heterogeneous at the

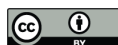

micro-scale (Beltrame et al. 2018). Hence, the drivers and processes leading to health risk dynamics are not widely analysed systematically alongside climate processes (Berry et al. 2018).

### 160 3 Research agenda and knowledge transfer

Impacts of recent disasters have demonstrated the clear need to better understand and model the interactions between disasters, disease outbreaks, and to account for health impacts of disasters. Therefore we recommend the following research agenda, which is relevant for scientists seeking to enhance risk modelling capabilities, as well as for decision-makers and practitioners tasked with anticipating and addressing the growing complexity of disaster risks.

165

Modelling the probability of co-occurrence of disasters and disease outbreaks is critical for forecasting the impacts of disasters compounded with health crises. This is imperative to prevent and prepare for the outbreak of diseases following disasters. A potential direction is to adopt the methodological advances from neighbouring fields such as multi-hazard modelling that capture interactions and feedback across disasters by utilizing the increasingly available large-scale databases.

170 This includes approaches such as copulas, (dynamic) bayesian networks, event coincidence analysis, and other multivariate statistical analysis (Tilloy et al. 2019).

In addition to the probability of co-occurrences of disasters and diseases, the socio-economic dimension of the affected populations plays a critical role in making them susceptible to the impacts of disasters and diseases. Hence, we need comprehensive mapping of the socio-economic attributes of the populations along with post-disaster relief and recovery pathways considering scenarios of successive disaster and disease occurrences (Kouadio et al. 2012, Suk et al. 2020). This calls for adopting several methods innovated by the socio-hydrology community – for instance, mechanistic models with storylines that are supported by empirical evidence and information obtained through expert knowledge (in the form of informative priors in Bayesian models – Barendrecht et al. 2019). Mechanistic models help identify pathways consisting of drivers and feedback of cascading impacts in the disaster-human-health system (Beltrame et al. 2018). They also facilitate the simulation of counterfactual scenarios which help conceptualize different intervention strategies (Adshead et al 2019). In order to conceptualize adaptation strategies at local- and region-levels, interventions from both public health (e.g., health-behaviour, education and training, supportive counselling) and disaster risk management (e.g., risk transfer, institutional framework, disaster risk reduction policy) needs to be identified and evaluated. A systemic understanding of the disaster-human-health system in the context of financial and social capacity to cope, comorbidity and existing institutional framework is pertinent to develop socially-optimal interventions (Savigny & Taghreed, 2009).

185

In addition to improving process understanding, exploring the use of different data types and sources would support disaster risk reduction in data-sparse situations. Health impacts of disasters are predominantly modelled using reported information



190 and survey data. However, collecting disaster-specific impact data is challenging, as it requires field visits following the disaster, potentially disrupting recovery efforts. These data collection campaigns are time-consuming and resource-intensive. Additionally, surveys offer only a time-specific snapshot of society, failing to provide continuous monitoring of the evolving situation. Given these limitations, it is crucial to explore alternative data sources to better understand the relationship between disasters, diseases, and human health systems. For example, data sources such as remote sensing and Earth  
195 Observation (EO) data show promising results to assess environmental health hazards as it can for example be used to detect damages WASH infrastructure or to identify long-standing flooded areas which in turn have a higher risk of waterborne disease outbreaks or can turn into mosquito breeding sites. Sogno et al., (2022) used EO data along with other publicly available datasets to map environments that impact public health, in specific the risk of myocardial infarction. As these data types tend to cover large temporal and spatial scales, they are explicitly useful for the assessment of the interactions between  
200 environmental factors and disaster impacts (Van Maanen et al., 2024). For example, Nusrat et al., (2022) used EO data to forecast the risk of waterborne diseases after disasters and Shah et al., (2023) conducted a literature review on the use of EO data for the mapping of WASH-related infrastructure and quality. Development of such mixed-method (model and data-driven) approaches requires transdisciplinary knowledge from Natural Sciences, Public Health and Social Sciences that can be used by these different sub-fields without making disciplinary compromises. Rather than trying to synergise different  
205 methods, scientists need to explore opportunities to create complementary methods and approaches to better understand the interactions between disasters and diseases, and the health impacts of disasters. In this respect, we have conceptualized a research agenda (Table 1).

**Table 1. Agenda for advancing research into the convergence of natural hazards and health crises**

| Research Question                                                                     | Methods                                                                                                                                             | Potential Outcomes                                                                                                                     |
|---------------------------------------------------------------------------------------|-----------------------------------------------------------------------------------------------------------------------------------------------------|----------------------------------------------------------------------------------------------------------------------------------------|
| How can we model the probability of co-occurrence of disasters and disease outbreaks? | Adapted from Multi-hazard modelling - such as, copulas, (dynamic) Bayesian networks, event coincidence analysis, multivariate statistical analysis  | Improved forecasting of disaster-induced disease outbreaks, better preparedness and prevention strategies                              |
| What are the drivers and feedback mechanisms in disaster-human-health systems?        | Comprehensive mapping of socio-economic variables, socio-hydrology approaches such as, storyline-based approaches, mechanistic models with Bayesian | Identification of vulnerable populations, pathways of cascading impacts, and improved intervention and post-disaster relief strategies |





|                                                                                                     |                                                                                                                                                                                                                    |                                                                                                                                    |
|-----------------------------------------------------------------------------------------------------|--------------------------------------------------------------------------------------------------------------------------------------------------------------------------------------------------------------------|------------------------------------------------------------------------------------------------------------------------------------|
|                                                                                                     | approaches with informative priors and empirical data.                                                                                                                                                             |                                                                                                                                    |
| What are the alternative data sources to improve disaster risk reduction in data-sparse situations? | Use of remote sensing - Earth Observation (EO) data, integration with publicly available datasets                                                                                                                  | Enhanced assessment of environmental health hazards, improved monitoring of WASH infrastructure and disease outbreak risks         |
| How can health impact metrics be integrated into disaster risk assessment frameworks?               | Use of Disability Adjusted Life Years (DALY), Years of Life Lost (YLL), and Years Lived with Disability (YLD) in risk models, systematic analysis of cascading health impacts, micro-scale health risk attribution | More comprehensive assessment of disaster-related health burdens, improved policy decisions incorporating long-term health effects |

210

The research agenda calling for an increased understanding of disasters, diseases and health impacts is targeted not only towards scientific advancement, but also aims to contribute to the following Sustainable Development Goals (SDGs): SDG3 (good health and wellbeing), SDG 6 (clean water and sanitation), SDG 11 (sustainable cities and communities), SDG 13 (climate action), and SDG 16 (peace, justice, and strong institutions) (see, Figure 2).

215

An improved understanding and ability to assess the interactions between disasters, diseases and health impacts can support the improved risk management of disasters and diseases accounting for their interactions. In the literature, the challenge of managing the risk of multiple hazards has been acknowledged. For example, challenges of maladaptation (Schippers 2020) and asynergy of disaster risk reduction measures when measures aimed at reducing the risk of one hazard have opposing effects on the risk of another hazard (De Ruiter et al. 2021). Recent real-world examples have demonstrated that similar challenges can arise in the case of disasters and disease outbreaks. For example, when the Philippines were hit by typhoon Goni during the Covid-19 pandemic, people were evacuated based on the typhoon track forecasts and forced to huddle together in evacuation facilities, enabling the spread of Covid (Gonzalo Ladera and Tiemroth 2021; IFRC-DREF, 2020). Our

220



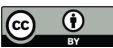

research agenda (Table 1) targeting process-based models considering societal and individual attributes accounts for the  
225 vulnerability dynamics (heterogeneity in local circumstances) within which these events take place. The role of vulnerability  
dynamics in developing comprehensive risk management measures and equitable adaptation is highlighted by recent  
research (De Ruiter and Van Loon 2022, Haer and De Ruiter 2024).

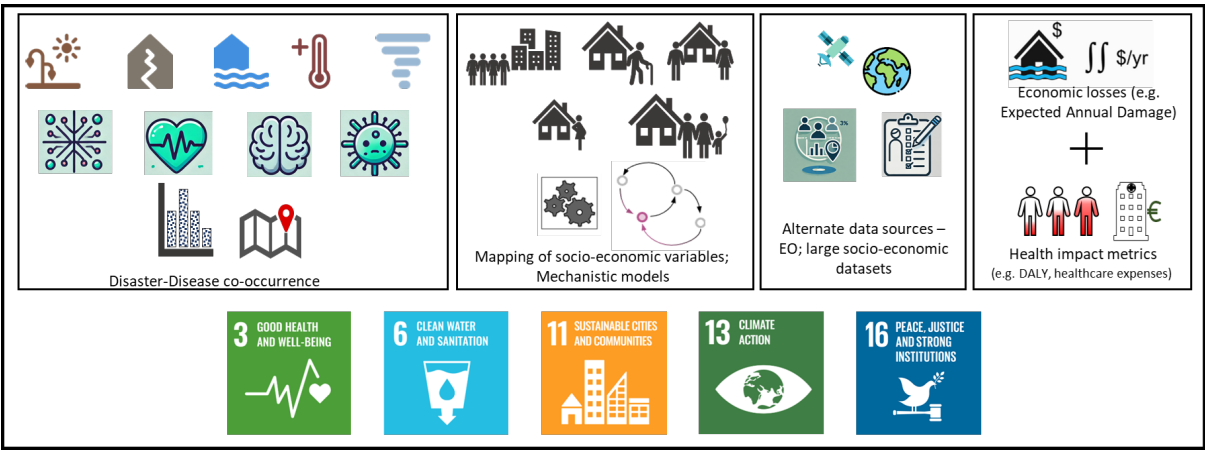

230 **Figure 2. Research agenda for advancing our understanding of the Disaster-Diseases and Human Health System**

#### 4 Conclusions

This perspective paper underscores the urgent need to improve the integration of health impacts, disease outbreaks, into  
multi-hazard disaster risk assessments and management. As the frequency and complexity of concurrent disasters—such as  
235 natural hazards compounded by health crises—continue to rise, it is clear that current risk assessment models are not yet  
sufficiently capable to capture the full range of potential impacts. Bridging this gap requires the incorporation of novel  
approaches from fields such as socio-hydrology and multi-hazard modelling, which focus on understanding the  
interdependencies and feedbacks between disasters, diseases, and health systems.

240 The research agenda outlined herein highlights the importance of modelling the probability and temporal dynamics of  
disaster-health interactions, particularly the likelihood of disease outbreaks following natural disasters. It emphasizes the  
need for a more comprehensive mapping of socio-economic vulnerabilities, which influence the resilience of affected  
populations. By adopting mixed-method approaches that combine remote sensing data, earth observation, and empirical field  
data, we can enhance our ability to predict and mitigate the health impacts of disasters. The goal is not only to improve  
245 scientific understanding but also to provide actionable insights for practitioners and policymakers to create more effective  
and contextually appropriate interventions.



Furthermore, this agenda is aligned with key Sustainable Development Goals (SDGs) related to health, climate action, and resilience. Specifically, it contributes to SDG 6 (clean water and sanitation), SDG 11 (sustainable cities and communities),  
250 SDG 13 (climate action), and SDG 16 (peace, justice, and strong institutions), all of which require an integrated and systems-level approach to risk management.

Ultimately, this research perspective calls for a paradigm shift in disaster risk management—one that prioritizes a holistic understanding of disaster-human-health systems and leverages the full potential of interdisciplinary knowledge and  
255 technological advances. By fostering greater collaboration across disciplines and integrating health-related metrics into conventional risk frameworks, we can enhance our preparedness and response to the growing complexity of disaster risks, ensuring more resilient communities in the face of multiple, simultaneous hazards.

### Competing interests

260 NS and MCdR are guest editors of special issues in NHESS.

### Acknowledgements

MCdR received support from the MYRIAD-EU project, which received funding from the European Union's Horizon 2020 research and innovation programme under grant agreement No [101003276](#), and by the Netherlands Organisation for  
265 Scientific Research (NWO) (VENI; grant no. VI.Veni.222.169). NS is funded by BMBF junior research group on Climate Environment and Health (HI-CliF) grant number - FKZ 01LN2209A.

### References

- 270 Adshead, D., Thacker, S., Fuldauer, L. I., & Hall, J. W. (2019). Delivering on the Sustainable Development Goals through long-term infrastructure planning. *Global Environmental Change*, 59, 101975.
- Agache I, Sampath V, Aguilera J, et al. Climate change and global health: A call to more research and more action. *Allergy*. 2022; 77: 1389–1407. doi:10.1111/all.15229
- 275 AghaKouchak A, Chiang F, Huning LS, et al. Climate Extremes and Compound Hazards in a Warming World. *Annu Rev Earth Planet Sci*. Published online 2020. doi:10.1146/annurev-earth-071719-055228
- Aitsi-Selmi A, Murray V. Protecting the health and well-being of populations from disasters: health and health care in The Sendai Framework for Disaster Risk Reduction 2015-2030. *Prehosp Disaster Med*. 2016;31(1):74-78.



- 280 Alfieri, L., Feyen, L., Dottori, F., & Bianchi, A. (2015). Ensemble flood risk assessment in Europe under high end climate scenarios. *Global Environmental Change*, 35, 199-212.
- Apel, D., & Coenen, M. (2020). Physical symptoms and health-care utilization in victims of the 2013 flood disaster in Germany. *International Journal of Disaster Risk Reduction*
- 285 Barendrecht, M. H., Viglione, A., Kreibich, H., Merz, B., Vorogushyn, S., & Blöschl, G. (2019). The value of empirical data for estimating the parameters of a sociohydrological flood risk model. *Water Resources Research*, 55, 1312–1336. <https://doi.org/10.1029/2018WR024128>
- Beltrame L, Dunne T, Vineer HR, Walker JG, Morgan ER, Vickerman P, McCann CM, Williams DJL, Wagener T. 2018. A mechanistic hydro-epidemiological model of liver fluke risk. *J. R. Soc. Interface* 15: 20180072. <http://dx.doi.org/10.1098/rsif.2018.0072>
- 290 Bevacqua E, Zappa G, Lehner F, Zscheischler J. Precipitation trends determine future occurrences of compound hot–dry events. *Nat Clim Chang*. 2022;12(4):350-355.
- 295 Berry, H. L., Waite, T. D., Dear, K. B., Capon, A. G., & Murray, V. (2018). The case for systems thinking about climate change and mental health. *Nature Climate Change*, 8(4), 282-290.
- Bubeck, P., Berghäuser, L., Hudson, P., & Thielen, A. H. (2020). Using panel data to understand the dynamics of human behavior in response to flooding. *Risk Analysis*, 40(11), 2340-2359.
- 300 Cabas, A., Lorenzo-Velazquez, C., Ingabire Abayo, N., Ji, C., Ramirez, J., Garcia, F. E., ... & Remington, C. L. (2023). Intersectional Impacts of the 2021 M w 7.2 Nippes, Haiti, Earthquake from Geotechnical and Social Perspectives. *Bulletin of the Seismological Society of America*, 113(1), 73-98. <https://doi.org/10.1785/0120220118>
- 305 Cavallo, E., Alvarez, L.G., & Powell, A. (2021). Estimating the Potential Economic Impact of Haiti's 2021 Earthquake (Technical Note No. IDB-TN-2297). Inter-American Development Bank (IDB). <https://publications.iadb.org/en/publications/english/viewer/Estimating-the-Potential-Economic-Impact-of-Haitis-2021-Earthquake.pdf>
- 310 Caribbean Disaster Emergency Management Agency (CDEMA). (2021, September 9). Situation Report #11 - Haiti Earthquake. <https://reliefweb.int/report/haiti/situation-report-11-haiti-earthquake-500-pm-9-september-2021>



Charnley, G. E., Kelman, I., Gaythorpe, K. A., & Murray, K. A. (2021). Traits and risk factors of post-disaster infectious disease outbreaks: a systematic review. *Scientific reports*, 11(1), 1-14.

315

Chatterton, J., Viavattene, C., Morris, J., Penning-Rowsell, E., Tapsell, S., Flood Hazard Research Centre and Cranfield University, Department of Natural Resources 2010. *The costs of the summer 2007 floods in England*. Bristol, UK Environment Agency.

320 Cutter SL. Compound, cascading, or complex disasters: what's in a name? *Environ Sci policy Sustain Dev*. 2018;60(6):16-25.

Daniels, J. P. (2021). Earthquake compounds Haiti's health challenges. *The Lancet*, 398(10304), 944-945. [https://doi.org/10.1016/S0140-6736\(21\)02009-2](https://doi.org/10.1016/S0140-6736(21)02009-2)

325

De Angeli S, Malamud BD, Rossi L, Taylor FE, Trasforini E, Rudari R. A multi-hazard framework for spatial-temporal impact analysis. *International Journal of Disaster Risk Reduct*. 2022;73:102829.

De Groote, H., Kimenju, S. C., Munyua, B., Palmas, S., Kassie, M., & Bruce, A. (2020). Spread and impact of fall armyworm (*Spodoptera frugiperda* JE Smith) in maize production areas of Kenya. *Agriculture, ecosystems & environment*, 292, 106804.

330

De Luca P, Hillier JK, Wilby RL, Quinn NW, Harrigan S. Extreme multi-basin flooding linked with extra-tropical cyclones. *Environ Res Lett*. 2017;12(11):114009.

335

de Ruiter MC, Van Loon AF. The challenges of dynamic vulnerability and how to assess it. *IScience*. Published online 2022:104720.

de Ruiter MC, Couasnon A, van den Homberg M, Daniell JE, Gill JC, Ward PJ. Why we can no longer ignore consecutive disasters. Published online 2020.

340

Drakes O, Tate E. Social vulnerability in a multi-hazard context: a systematic review. *Environ Res Lett*. Published online 2022.

345 FEWS NET. (2019). Ethiopia: Food Security Outlook: October 2018 to May 2019. Retrieved from [https://reliefweb.int/sites/reliefweb.int/files/resources/ETHIOPIA\\_Food\\_Security\\_Outlook\\_October2018.pdf](https://reliefweb.int/sites/reliefweb.int/files/resources/ETHIOPIA_Food_Security_Outlook_October2018.pdf)



Foudi, S., N. Os\_es-Eraso, and I. Galarraga (2017), The effect of flooding on mental health: Lessons learned for building resilience, *Water Resour. Res.*, 53, 5831–5844, doi:10.1002/2017WR020435.

350

Funk, C., Hoell, A., Nicholson, S., Korecha, D., Galu, G., Artan, G., et al. (2019). Examining the potential contributions of extreme “Western V” sea surface temperatures to the 2017 March–June East African Drought. *Bulletin of the American Meteorological Society*, 100(1), S55–S60. <https://doi.org/10.1175/BAMS-D-18-0108.1>

355 Gonzalo Ladera, L. A., & Tiemroth, A. (2021). Typhoon Disaster Response amid the COVID-19 Pandemic: A Case Study of Successive Typhoons in The Philippines in 2020.

Government of Haiti (GoH). (2021). Post-Disaster Needs Assessment in Haiti: Earthquake of 14 August 2021 in the southern peninsula - executive summary.

360

Hillier JK, Matthews T, Wilby RL, Murphy C. Multi-hazard dependencies can increase or decrease risk. *Nat Clim Chang*. 2020;10(7):595-598.

Huynh, T. T. N., Hofstra, N., Nguyen, H. Q., Baker, S., Pathirana, A., Corzo Perez, G. A., & Zevenbergen, C. (2024). Estimating disease burden of rotavirus in floodwater through traffic in the urban areas: A case study of Can Tho city, Vietnam. *Journal of Flood Risk Management*, 17(1), e12955.

365

International Federation of Red Cross and Red Crescent Societies (IFRC). (2022, December 10). Haiti, Americas Region: Earthquake and Cholera - Revised Emergency Appeal No. MDRHT018. <https://reliefweb.int/report/haiti/haiti-americas-region-earthquake-and-cholera-revised-emergency-appeal-no-mdrht018>

370

Isidore K Kouadio, Syed Aljunid, Taro Kamigaki, Karen Hammad & Hitoshi Oshitani (2012) Infectious diseases following natural disasters: prevention and control measures, *Expert Review of Anti-infective Therapy*, 10:1, 95-104, DOI: 10.1586/eri.11.155

375 Jato-Espino, D., Machado, C., & Roldán-Valcarce, A. (2025). A compact multi-hazard assessment model to identify urban areas prone to heat islands, floods and particulate matter. *International Journal of Disaster Risk Reduction*, 105277.

Jiseon Lee, Duminda Perera, Talia Glickman, Lina Taing, Water-related disasters and their health impacts: A global review, *Progress in Disaster Science*, Volume 8, 2020, 100123, ISSN 2590-0617, <https://doi.org/10.1016/j.pdisas.2020.100123>.

380

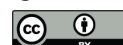

Jutla A, Khan R, Colwell R. Natural disasters and cholera outbreaks: current understanding and future outlook. *Curr Environ Heal reports*. 2017;4(1):99-107.

Kelman I. *Disaster by Choice: How Our Actions Turn Natural Hazards into Catastrophes*. Oxford University Press; 2020.

385

Khakzad N. Application of dynamic Bayesian network to risk analysis of domino effects in chemical infrastructures. *Reliab Eng Syst Saf*. 2015;138:263-272.

390

Kilavi, M., MacLeod, D., Ambani, M., Robbins, J., Dankers, R., Graham, R., et al. (2018). Extreme rainfall and flooding over central Kenya including Nairobi city during the long-rains season 2018: Causes, predictability, and potential for early warning and actions. *Atmosphere*, 9(12), 472. <https://doi.org/10.3390/atmos9120472>

Korswagen PA, Jonkman SN, Terwel KC. Probabilistic assessment of structural damage from coupled multi-hazards. *Struct Saf*. 2019;76(June 2018):135-148. doi:10.1016/j.strusafe.2018.08.001

395

Kreibich, H., Van Loon, A.F., Schröter, K. et al. The challenge of unprecedented floods and droughts in risk management. *Nature* **608**, 80–86 (2022). <https://doi.org/10.1038/s41586-022-04917-5>

400

Kumela, T., Simiyu, J., Sisay, B., Likhayo, P., Mendesil, E., Gohole, L., & Tefera, T. (2019). Farmers' knowledge, perceptions, and management practices of the new invasive pest, fall armyworm (*Spodoptera frugiperda*) in Ethiopia and Kenya. *International Journal of Pest Management*, 65(1), 9. <https://doi.org/10.1080/09670874.2017.1423129>

Liu Z, Nadim F, Garcia-Aristizabal A, Mignan A, Fleming K, Luna BQ. A three-level framework for multi-risk assessment. *Georisk*. 2015;9(2):59-74. doi:10.1080/17499518.2015.1041989

405

Lo Iacono G, Armstrong B, Fleming LE, Elson R, Kovats S, Vardoulakis S, et al. (2017) Challenges in developing methods for quantifying the effects of weather and climate on water-associated diseases: A systematic review. *PLoS Negl Trop Dis* 11(6): e0005659. <https://doi.org/10.1371/journal.pntd.0005659>

410

Matanó A, de Ruiter MC, Koehler J, Ward PJ, Van Loon AF. Caught Between Extremes: Understanding Human-Water Interactions During Drought-To-Flood Events in the Horn of Africa. *Earth's Futur*. 2022;10(9):e2022EF002747.

Marzocchi W, Garcia-Aristizabal A, Gasparini P, Mastellone ML, Ruocco A Di. Basic principles of multi-risk assessment: A case study in Italy. *Nat Hazards*. Published online 2012. doi:10.1007/s11069-012-0092-x

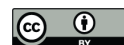

- 415 Matthews T, Wilby RL, Murphy C. An emerging tropical cyclone–deadly heat compound hazard. *Nat Clim Chang*. 2019;1.  
doi:10.1038/s41558-019-0525-6
- Mazdiyasni O, AghaKouchak A. Natural disasters are prejudiced against disadvantaged and vulnerable populations: The lack  
of publicly available health-related data hinders research at the cusp of the global climate crisis. *GeoHealth*.  
420 2020;4(1):e2019GH000219.
- McMichael AJ. Human population health: sentinel criterion of environmental sustainability. *Curr Opin Environ Sustain*.  
2009;1(1):101-106.
- 425 Moftakhari H, Schubert JE, AghaKouchak A, Matthew RA, Sanders BF. Linking statistical and hydrodynamic modeling for  
compound flood hazard assessment in tidal channels and estuaries. *Adv Water Resour*. 2019;128:28-38.  
doi:10.1016/j.advwatres.2019.04.009
- Mora C, McKenzie T, Gaw IM, et al. Over half of known human pathogenic diseases can be aggravated by climate change.  
430 *Nat Clim Chang*. 2022;12(9):869-875.
- Murray V. UNDRR Hazard Definition & Classification Review. 2020. [undrr.org/publication/hazard-definition-and-classification-review](https://undrr.org/publication/hazard-definition-and-classification-review).
- 435 Njogu, H. W. (2021). Effects of floods on infrastructure users in Kenya. *Journal of Flood Risk Management*, 14(4), e12746.  
<https://doi.org/10.1111/jfr3.12746>
- Nusrat, F., Haque, M., Rollend, D., Christie, G., & Akanda, A. S. (2022). A High-Resolution Earth Observations and  
Machine Learning-Based Approach to Forecast Waterborne Disease Risk in Post-Disaster Settings. *Climate*, 10(4), 48.  
440 <https://doi.org/10.3390/cli10040048>
- Paprotny D, Kreibich H, Morales-Nápoles O, et al. A probabilistic approach to estimating residential losses from different  
flood types. *Nat Hazards*. Published online 2020:1-33.
- Paranjothy, S., Gallacher, J., Amlôt, R., Rubin, G. J., Page, L., Baxter, T., ... & Palmer, S. R. (2011). Psychosocial impact of  
445 the summer 2007 floods in England. *BMC public health*, 11(1), 1-8.
- Philip, S., Kew, S. F., van Oldenborgh, G. J., Otto, F., O’Keefe, S., Haustein, K., et al. (2018). Attribution analysis of the  
Ethiopian drought of 2015. *Journal of Climate*, 31(6), 2465–2486. <https://doi.org/10.1175/JCLI-D-17-0274.1>





- 450 Raymond C, Horton RM, Zscheischler J, et al. Understanding and managing connected extreme events. *Nat Clim Chang*. 2020;10(7):611-621.
- Reinhart, B.J., & Berg, R. (2022). National hurricane center tropical cyclone report: Hurricane Grace (Report No. AL072021). National Oceanic and Atmospheric Administration (NOAA).
- 455 [https://www.nhc.noaa.gov/data/tcr/AL072021\\_Grace.pdf](https://www.nhc.noaa.gov/data/tcr/AL072021_Grace.pdf)
- Ridder NN, Pitman AJ, Westra S, et al. Global hotspots for the occurrence of compound events. *Nat Commun*. 2020;11(1):1-10.
- 460 Sairam, N., Brill, F., Sieg, T., Farrag, M., Kellermann, P., Nguyen, V. D., et al. (2021). Process-based flood risk assessment for Germany. *Earth's Future*, 9, e2021EF002259. <https://doi.org/10.1029/2021EF002259>
- Savigny, D.d. & Taghreed, A. (eds) Systems Thinking for Health System Strengthening (World Health Organization, 2009).
- 465 Scheiber, L., Sairam, N., Hoballah Jalloul, M., Rafiezadeh Shahi, K., Jordan, C., Visscher, J., et al. (2024). Effective adaptation options to alleviate nuisance flooding in coastal megacities—learning from Ho Chi Minh City, Vietnam. *Earth's Future*, 12, e2024EF004766. <https://doi.org/10.1029/2024EF004766>
- Sett, D., Trinh, T. P., Wasim, T., Ortiz-Vargas, A., Nguyen, D. G. C., Büche, K., ... & Hagenlocher, M. (2024). Advancing understanding of the complex nature of flood risks to inform comprehensive risk management: Findings from an urban region in Central Vietnam. *International Journal of Disaster Risk Reduction*, 110, 104652.
- 470 Simpson NP, Mach KJ, Constable A, et al. A framework for complex climate change risk assessment. *One Earth*. 2021;4(4):489-501.
- 475 Sogno, P., Kuenzer, C., Bachofer, F., & Traidl-Hoffmann, C. (2022). Earth observation for exposome mapping of Germany: analyzing environmental factors relevant to non-communicable diseases. *International Journal of Applied Earth Observation and Geoinformation*, 114, 103084.
- Sperotto A, Molina J-L, Torresan S, Critto A, Marcomini A. Reviewing Bayesian Networks potentials for climate change impacts assessment and management: A multi-risk perspective. *J Environ Manage*. 2017;202:320-331.
- 480



Speis, P. D., Andreadakis, E., Diakakis, M., Daidassi, E., & Sarigiannis, G. (2019). Psychosocial vulnerability and demographic characteristics in extreme flash floods: The case of Mandra 2017 flood in Greece. *International Journal of Disaster Risk Reduction*, 41, 101285

485

Stanke C, Murray V, Amlôt R, Nurse J, Williams R. The Effects of Flooding on Mental Health: Outcomes and Recommendations from a Review of the Literature. PLOS Currents Disasters. 2012 May 30 .Edition 1. doi: 10.1371/4f9f1fa9c3cae.

490 Steinhausen, M., Paprotny, D., Dottori, F., Sairam, N., Mentaschi, L., Alfieri, L., ... & Schröter, K. (2022). Drivers of future fluvial flood risk change for residential buildings in Europe. *Global Environmental Change*, 76, 102559.

Suk, J. E., Vaughan, E. C., Cook, R. G., & Semenza, J. C. (2020). Natural disasters and infectious disease in Europe: a literature review to identify cascading risk pathways. *European journal of public health*, 30(5), 928-935.

495

Sutanto SJ, Vitolo C, Di Napoli C, D'Andrea M, Van Lanen HAJ. Heatwaves, droughts, and fires: Exploring compound and cascading dry hazards at the pan-European scale. *Environ Int*. 2020;134:105276.

500 Tilloy, A., Malamud, B. D., Winter, H., & Joly-Laugel, A. (2019). A review of quantification methodologies for multi-hazard interrelationships. *Earth-Science Reviews*, 196, 102881.

Tripathy, S. S., Bhatia, U., Mohanty, M., Karmakar, S., & Ghosh, S. (2021). Flood evacuation during pandemic: a multi-objective framework to handle compound hazard. *Environmental Research Letters*, 16(3), 034034.

505 Uhe, P., Philip, S., Kew, S., Shah, K., Kimutai, J., Mwangi, E., et al. (2018). Attributing drivers of the 2016 Kenyan drought. *International Journal of Climatology*, 38(December), e554–e568. <https://doi.org/10.1002/joc.5389>

UNDRR. *Our World at Risk: Transforming Governance for a Resilient Future.*; 2022.

510 United Nations. *Paris Agreement.*; 2015. Accessed October 11, 2018. [//unfccc.int/resource/docs/2015/cop21/eng/l09r01.pdf](https://unfccc.int/resource/docs/2015/cop21/eng/l09r01.pdf)  
UNDRR. *Sendai Framework for Disaster Risk Reduction 2015 - 2030.*; 2015. Accessed November 5, 2024. [unisdr.org/files/43291\\_sendaiframeworkfordrren.pdf](https://www.unisdr.org/files/43291_sendaiframeworkfordrren.pdf).

515 United Nations Office for the Coordination of Humanitarian Affairs (OCHA). (2021, September 23). Haiti: Earthquake Situation Report No. 6. <https://reliefweb.int/report/haiti/haiti-earthquake-situation-report-no-6-23-september-2021>



Ward PJ, Daniell J, Duncan M, et al. Invited perspectives: A research agenda towards disaster risk management pathways in multi-(hazard-) risk assessment. *Nat Hazards Earth Syst Sci.* 2022;22(4):1487-1497.

520 van Maanen, N., de Ruiter, M., & Ward, P. J. (2024). Workshop report: The role of Earth Observation for multi-(hazard-) risk assessment and management. *iScience*, 27(10).

Wahl T, Jain S, Bender J, Meyers SD, Luther ME. Increasing risk of compound flooding from storm surge and rainfall for major US cities. *Nat Clim Chang.* 2015;5(12):1093-1097. doi:10.1038/nclimate2736

525

Walker-Springett, K., Butler, C., & Adger, W. N. (2017). Wellbeing in the aftermath of floods. *Health & place*, 43, 66-74.

WHO. *Health Emergency and Disaster Risk Management Framework*. World Health Organization; 2019. [//apps.who.int/iris/handle/10665/326106](https://apps.who.int/iris/handle/10665/326106)

530

Wu, X., Lu, Y., Zhou, S., Chen, L., & Xu, B. (2016). Impact of climate change on human infectious diseases: Empirical evidence and human adaptation. *Environment international*, 86, 14-23.

535 Xoplaki, E., Ellsäßer, F., Grieger, J., Nissen, K. M., Pinto, J. G., Augenstein, M., ... & Wolf, F. (2025). Compound events in Germany in 2018: drivers and case studies. *Natural Hazards and Earth System Sciences*, 25(2), 541-564.

Ye, M., Ward, P.J., Bloemendaal, N. et al. Risk of Tropical Cyclones and Floods to Power Grids in Southeast and East Asia. *Int J Disaster Risk Sci* 15, 494–507 (2024). <https://doi.org/10.1007/s13753-024-00573-7>

540 Zscheischler J, Westra S, van den Hurk BJJM, et al. Future climate risk from compound events. *Nat Clim Chang.* 2018;8(6):469-477. doi:10.1038/s41558-018-0156-3
